# Supplementary material
Source: publisher figshare collection journal article supplement (https://tandf.figshare.com/ndownloader/files/22789844)
Supplement: Supplementary file 1 [file 22789844]

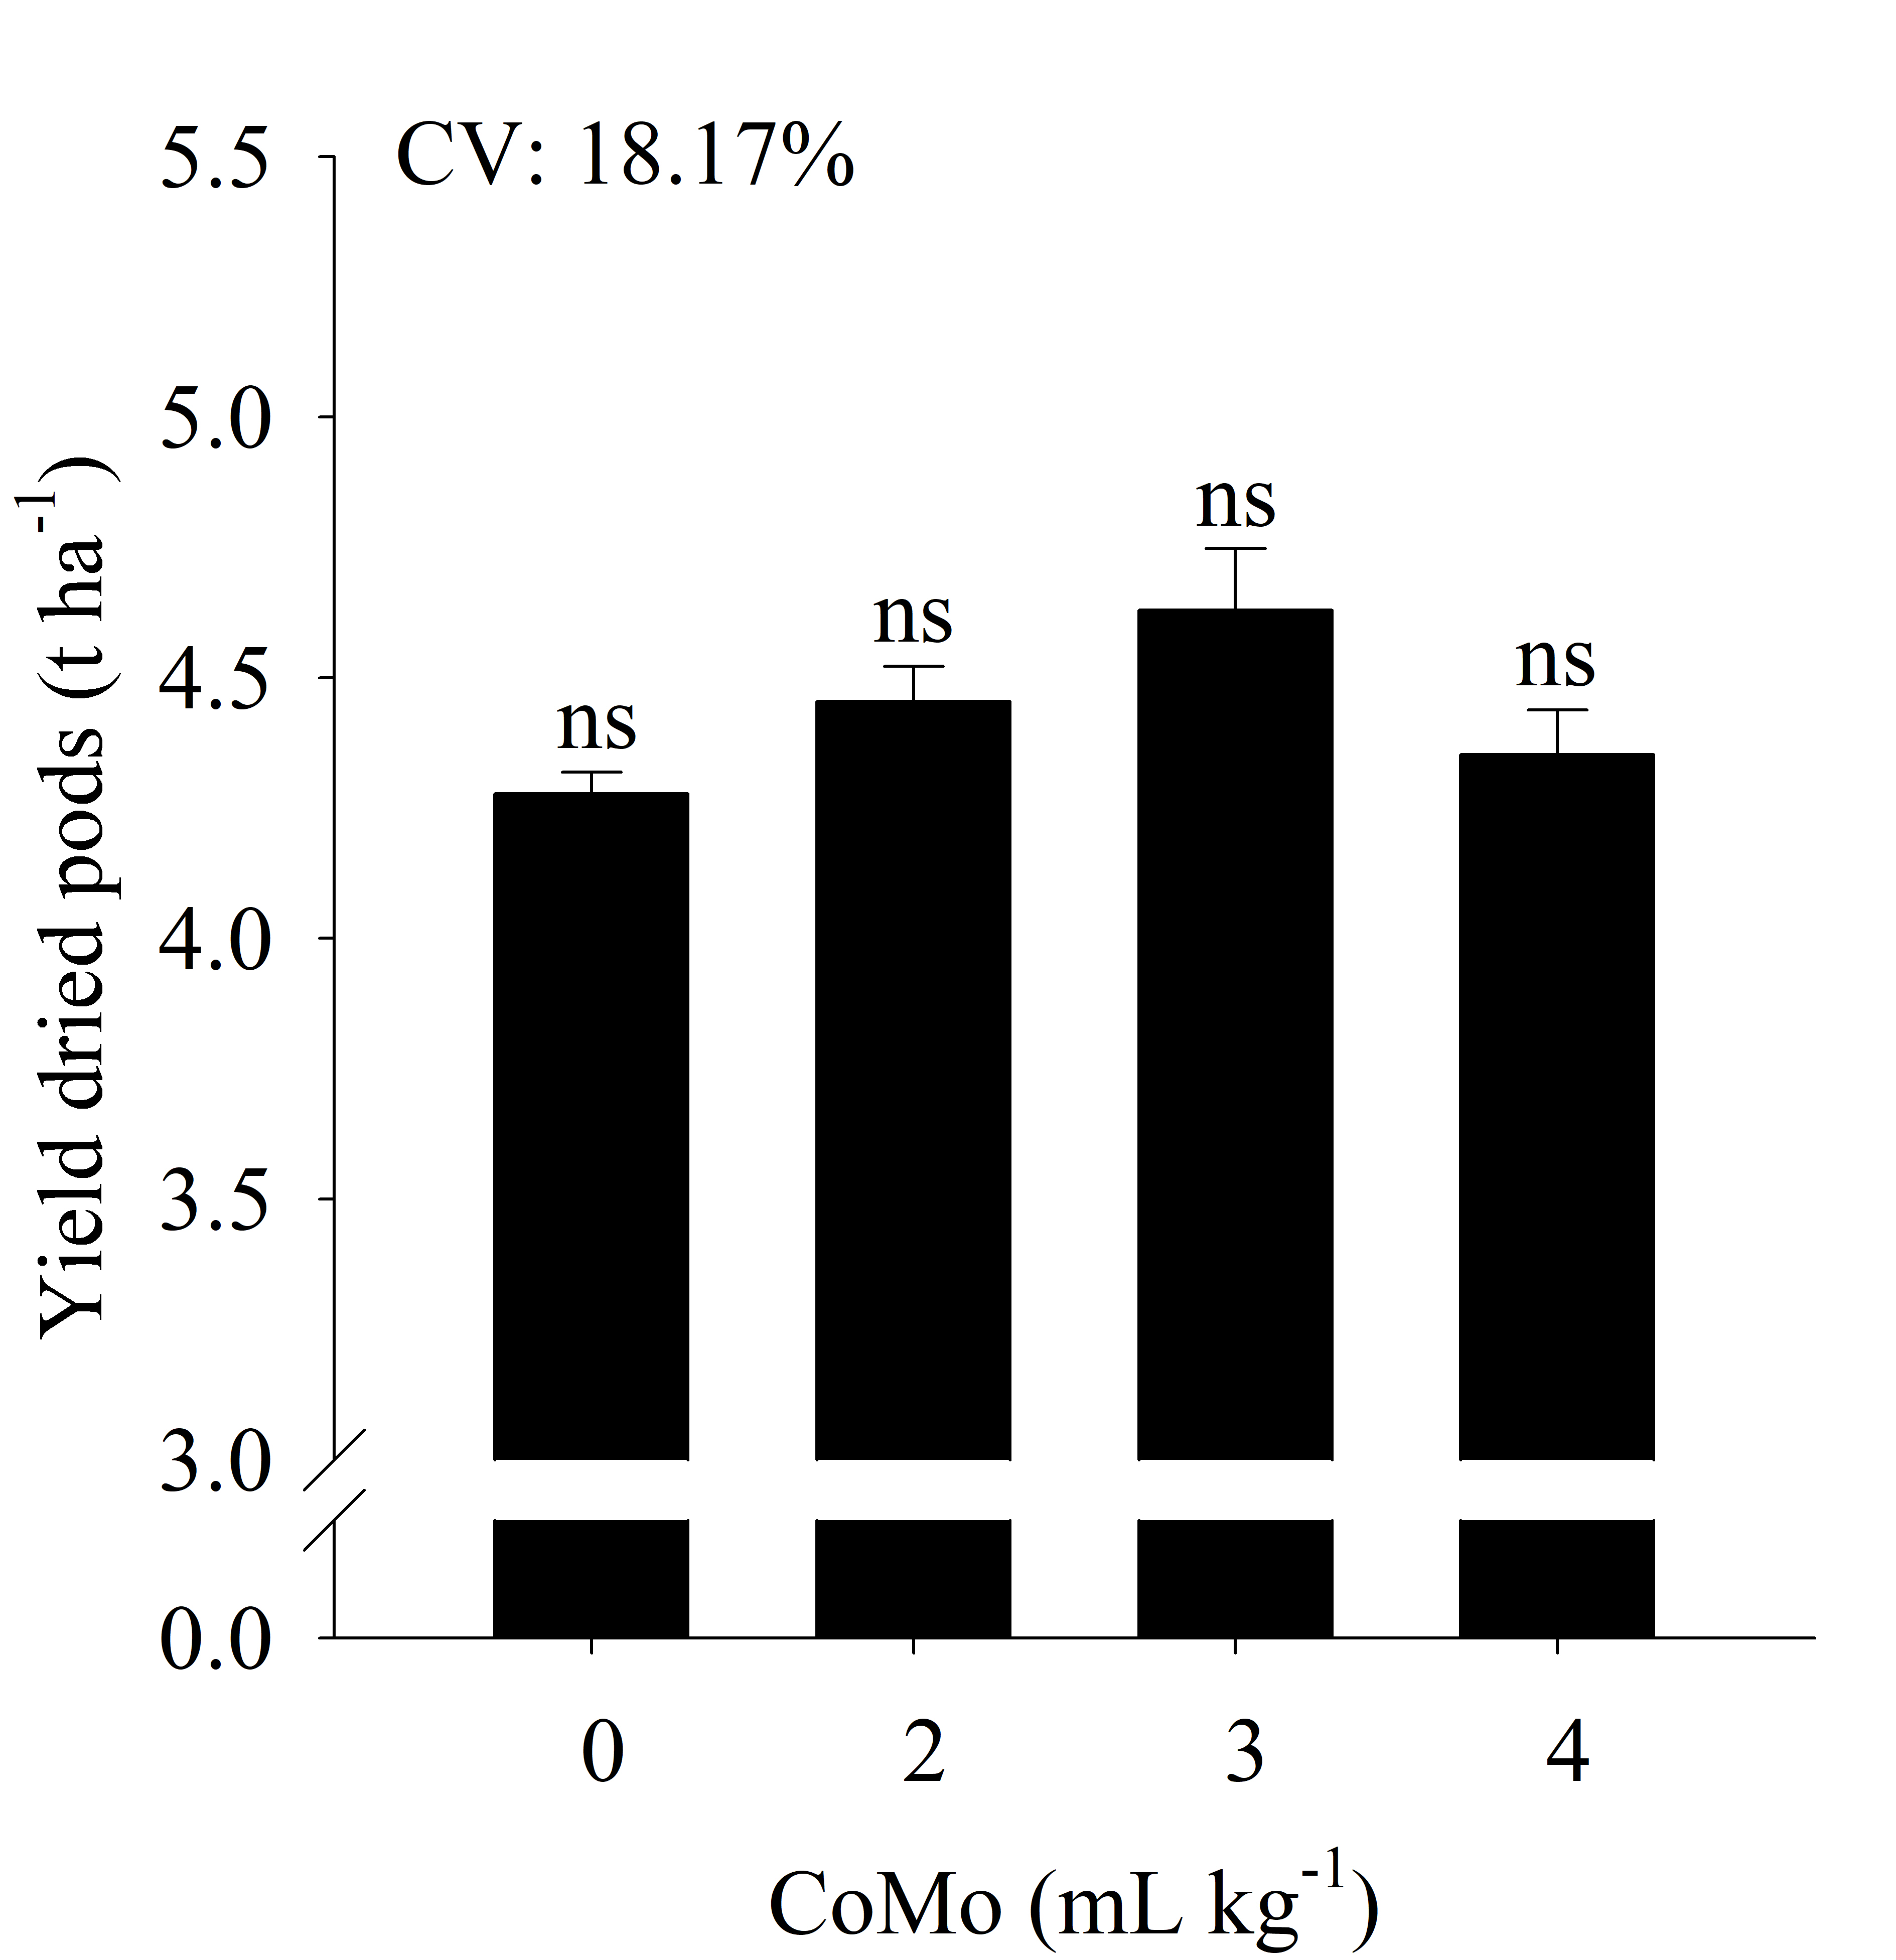


**Supplementary material 1.** Yield of dried pods in peanut (*Arachis hypogaea*) plants as a function of cobalt and molybdenum (CoMo) doses in the seed treatment. CV corresponds to the coefficient of variation. Letters classify means according to the Tukey test at 5% probability. The bars represent the standard error of the mean (n = 4).
